# Supplementary material
Source: PubMed Central journal article supplement (PMC6699166)
Supplement: NIHMS707989-supplement-Supp_AppendixTableS1-S3.pdf [file NIHMS707989-supplement-Supp_AppendixTableS1-S3.pdf]

| Table A1. Discrete Time Probit Estimates of Hazard of First Marriage, by Sex (Sensitivity Analysis Excluding Cohabitation Variable)                                                                                                                 |                                           |        |            |        |                                         |        |            |        |
|-----------------------------------------------------------------------------------------------------------------------------------------------------------------------------------------------------------------------------------------------------|-------------------------------------------|--------|------------|--------|-----------------------------------------|--------|------------|--------|
| Variable                                                                                                                                                                                                                                            | Females <sup>a</sup><br>( <i>n</i> = 504) |        |            |        | Males <sup>b</sup><br>( <i>n</i> = 462) |        |            |        |
|                                                                                                                                                                                                                                                     | Model 1                                   |        | Model 2    |        | Model 1                                 |        | Model 2    |        |
|                                                                                                                                                                                                                                                     | B                                         | SE     | B          | SE     | B                                       | SE     | B          | SE     |
| Intercept                                                                                                                                                                                                                                           | -2.81***                                  | 0.29   | -2.82***   | 0.29   | -2.78***                                | 0.32   | -2.73***   | 0.33   |
| Work/school status (2-year lag; ref.: regular work)                                                                                                                                                                                                 |                                           |        |            |        |                                         |        |            |        |
| Not working or in school                                                                                                                                                                                                                            | -0.25                                     | 0.16   | -0.23      | 0.16   | -0.61**                                 | 0.21   | -0.62**    | 0.21   |
| Non-regular work                                                                                                                                                                                                                                    | -0.17*                                    | 0.086  | -0.20*     | 0.088  | -0.52***                                | 0.14   | -0.56***   | 0.15   |
| School enrollment                                                                                                                                                                                                                                   | -0.50***                                  | 0.11   | -0.52***   | 0.11   | -0.79***                                | 0.13   | -0.80***   | 0.13   |
| School attainment (ref.: senior high school)                                                                                                                                                                                                        |                                           |        |            |        |                                         |        |            |        |
| Junior high school                                                                                                                                                                                                                                  | -0.27                                     | 0.18   | -0.32      | 0.19   | -0.17                                   | 0.13   | -0.27*     | 0.13   |
| Technical training school                                                                                                                                                                                                                           | -0.1                                      | 0.087  | -0.12      | 0.087  | -0.14                                   | 0.089  | -0.12      | 0.089  |
| Junior college/adv. technical                                                                                                                                                                                                                       | -0.16*                                    | 0.068  | -0.15*     | 0.069  | 0.12                                    | 0.12   | 0.073      | 0.13   |
| University or higher                                                                                                                                                                                                                                | -0.12                                     | 0.083  | -0.1       | 0.083  | 0.0085                                  | 0.072  | 0.036      | 0.073  |
| Age                                                                                                                                                                                                                                                 | 0.064***                                  | 0.011  | 0.064***   | 0.011  | 0.054***                                | 0.012  | 0.051***   | 0.012  |
| Age squared                                                                                                                                                                                                                                         | -0.0097***                                | 0.0014 | -0.0097*** | 0.0014 | -0.0066***                              | 0.0014 | -0.0066*** | 0.0014 |
| Cohabited                                                                                                                                                                                                                                           |                                           |        | 0.49***    | 0.12   |                                         |        | 0.63***    | 0.11   |
| Birth cohort (ref.: 1970)                                                                                                                                                                                                                           |                                           |        |            |        |                                         |        |            |        |
| 1971                                                                                                                                                                                                                                                | -0.062                                    | 0.078  | -0.058     | 0.078  | 0.074                                   | 0.078  | 0.05       | 0.078  |
| 1972                                                                                                                                                                                                                                                | 0.0016                                    | 0.074  | 0.0044     | 0.075  | -0.1                                    | 0.085  | -0.12      | 0.086  |
| 1973                                                                                                                                                                                                                                                | 0.038                                     | 0.077  | 0.024      | 0.077  | -0.012                                  | 0.082  | -0.02      | 0.083  |
| Sample (2009 cross-section = 1)                                                                                                                                                                                                                     | 0.19**                                    | 0.059  | 0.17**     | 0.059  | 0.13*                                   | 0.062  | 0.11       | 0.063  |
| -2LL                                                                                                                                                                                                                                                | 2,649.8                                   |        | 2,630.8    |        | 2,274.4                                 |        | 2,243.6    |        |
| <p>Note. ref. = reference category; adv. = advanced; LL = log likelihood.</p> <p><sup>a</sup>Number of person-years = 4,924. <sup>b</sup>Number of person-years = 5,485.</p> <p>*<i>p</i> &lt; .05. **<i>p</i> &lt; .01. ***<i>p</i> &lt; .001.</p> |                                           |        |            |        |                                         |        |            |        |

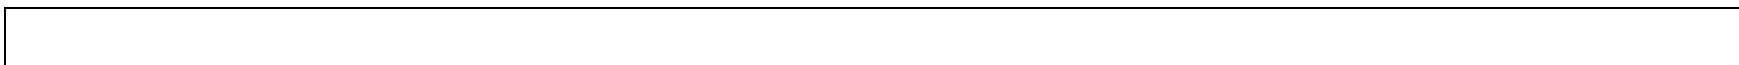

Table A2. Likelihood Ratio (LR) Tests for Models Interacting Sample Indicator (i.e., Cross-Section Vs. Panel) and Variable Main Effects

| Model (variance tested)         | Females        |           |                   |          | Males          |           |                   |          |
|---------------------------------|----------------|-----------|-------------------|----------|----------------|-----------|-------------------|----------|
|                                 | Log likelihood | <i>df</i> | LR test statistic | <i>p</i> | Log likelihood | <i>df</i> | LR test statistic | <i>p</i> |
| Baseline <sup>a</sup>           | -1,315.3781    |           |                   |          | -1,121.8253    |           |                   |          |
| Work/school status (2-year lag) | -1,313.4244    | 3         | 3.91              | .27      | -1,119.6939    | 3         | 4.26              | .23      |
| School attainment               | -1,313.0849    | 4         | 4.59              | .33      | -1,121.699     | 4         | 0.25              | .99      |
| Age & age squared               | -1,311.6494    | 2         | 7.46              | .02      | -1,118.508     | 2         | 6.63              | .04      |
| Cohabited                       | -1,314.9089    | 1         | 0.94              | .33      | -1,120.178     | 1         | 3.29              | .07      |
| Birth cohort                    | -1,312.4101    | 3         | 5.94              | .11      | -1,120.8467    | 3         | 1.96              | .58      |
| All variables                   | -1,305.8062    | 13        | 19.14             | .12      | -1,111.3585    | 13        | 20.93             | .07      |

<sup>a</sup>Model includes the main effect of all variables; all subsequent models were tested against this one.

Table A3. *Discrete Time Probit Estimates of Hazard of First Marriage, by Sex (Sensitivity Analysis More Cohorts, Younger Age at Marriage)*

| Variable                                            | Females             |        |                     |        | Males               |        |                     |       |
|-----------------------------------------------------|---------------------|--------|---------------------|--------|---------------------|--------|---------------------|-------|
|                                                     | Age 40 <sup>a</sup> |        | Age 30 <sup>a</sup> |        | Age 40 <sup>a</sup> |        | Age 30 <sup>a</sup> |       |
|                                                     | Coeff.              | SE     | Coeff.              | SE     | Coeff.              | SE     | Coeff.              | SE    |
| Intercept                                           | -2.82***            | 0.29   | -3.79***            | 0.35   | -2.73***            | 0.33   | -3.86***            | 0.43  |
| Work/school status (2-year lag; ref.: regular work) |                     |        |                     |        |                     |        |                     |       |
| Not working or in school                            | -0.23               | 0.16   | -0.38**             | 0.12   | -0.62**             | 0.21   | -0.26               | 0.14  |
| Non-regular work                                    | -0.20*              | 0.088  | -0.24***            | 0.063  | -0.56***            | 0.15   | -0.60***            | 0.11  |
| School enrollment                                   | -0.52***            | 0.11   | -0.43***            | 0.075  | -0.80***            | 0.13   | -0.72***            | 0.096 |
| School attainment (ref.: senior high school)        |                     |        |                     |        |                     |        |                     |       |
| Junior high school                                  | -0.32               | 0.19   | -0.098              | 0.14   | -0.27*              | 0.13   | -0.18               | 0.1   |
| Technical training school                           | -0.12               | 0.087  | -0.12*              | 0.062  | -0.12               | 0.089  | -0.022              | 0.067 |
| Junior college/adv. technical                       | -0.15*              | 0.069  | -0.16**             | 0.051  | 0.073               | 0.13   | -0.043              | 0.11  |
| University or higher                                | -0.1                | 0.083  | -0.21**             | 0.062  | 0.036               | 0.073  | 0.11                | 0.062 |
| Age                                                 | 0.064***            | 0.011  | 0.11***             | 0.015  | 0.051***            | 0.012  | 0.094***            | 0.017 |
| Age squared                                         | -0.0097***          | 0.0014 | -0.0100***          | 0.0026 | -0.0066***          | 0.0014 | -0.0098**           | 0.003 |
| Cohabited                                           | 0.49***             | 0.12   | 0.53***             | 0.079  | 0.63***             | 0.11   | 0.61***             | 0.091 |
| Birth cohort (ref.: 1970)                           |                     |        |                     |        |                     |        |                     |       |
| 1971                                                | -0.058              | 0.078  | -0.067              | 0.085  | 0.05                | 0.078  | 0.15                | 0.093 |
| 1972                                                | 0.0044              | 0.075  | -0.067              | 0.082  | -0.12               | 0.086  | -0.12               | 0.11  |
| 1973                                                | 0.024               | 0.077  | 0.014               | 0.083  | -0.02               | 0.083  | 0.048               | 0.098 |
| 1974                                                |                     |        | 0.044               | 0.084  |                     |        | -0.025              | 0.1   |
| 1975                                                |                     |        | -0.13               | 0.084  |                     |        | -0.088              | 0.11  |
| 1976                                                |                     |        | -0.01               | 0.086  |                     |        | -0.051              | 0.1   |
| 1977                                                |                     |        | -0.045              | 0.092  |                     |        | 0.0077              | 0.1   |

|                                                                                                                                                                                                                                                                                                                                                        |         |      |         |       |  |         |      |         |      |
|--------------------------------------------------------------------------------------------------------------------------------------------------------------------------------------------------------------------------------------------------------------------------------------------------------------------------------------------------------|---------|------|---------|-------|--|---------|------|---------|------|
| 1978                                                                                                                                                                                                                                                                                                                                                   |         |      | -0.16   | 0.09  |  |         |      | -0.063  | 0.11 |
| 1979                                                                                                                                                                                                                                                                                                                                                   |         |      | -0.16   | 0.093 |  |         |      | -0.076  | 0.11 |
| Sample (2009 cross-section = 1)                                                                                                                                                                                                                                                                                                                        | .17**   | .059 | .14***  | .042  |  | .11     | .063 | .15**   | .05  |
| Number of person-years                                                                                                                                                                                                                                                                                                                                 | 4,924   |      | 9,683   |       |  | 5,485   |      | 9,496   |      |
| -2LL                                                                                                                                                                                                                                                                                                                                                   | 2,630.8 |      | 4,895.2 |       |  | 2,243.6 |      | 3,426.4 |      |
| <p><i>Note.</i> Coeff. = coefficient; ref. = reference category; adv. = advanced; LL = log likelihood.</p> <p><sup>a</sup>Chow test for the difference between non-regular work coefficients for men and women was significant (<math>p &lt; .05</math>).</p> <p>*<math>p &lt; .05</math>. **<math>p &lt; .01</math>. ***<math>p &lt; .001</math>.</p> |         |      |         |       |  |         |      |         |      |
